# Supplementary material
Source: publisher site journal article supplement (https://www.spandidos-publications.com/7695/downloadSupplementary)

Figure S1. Compounds from the genus *Aglaia* have the cyclopenta[*b*]tetrahydrobenzofuran skeleton. Chemical structure of (A) silvestrol and (B) episilvestrol.

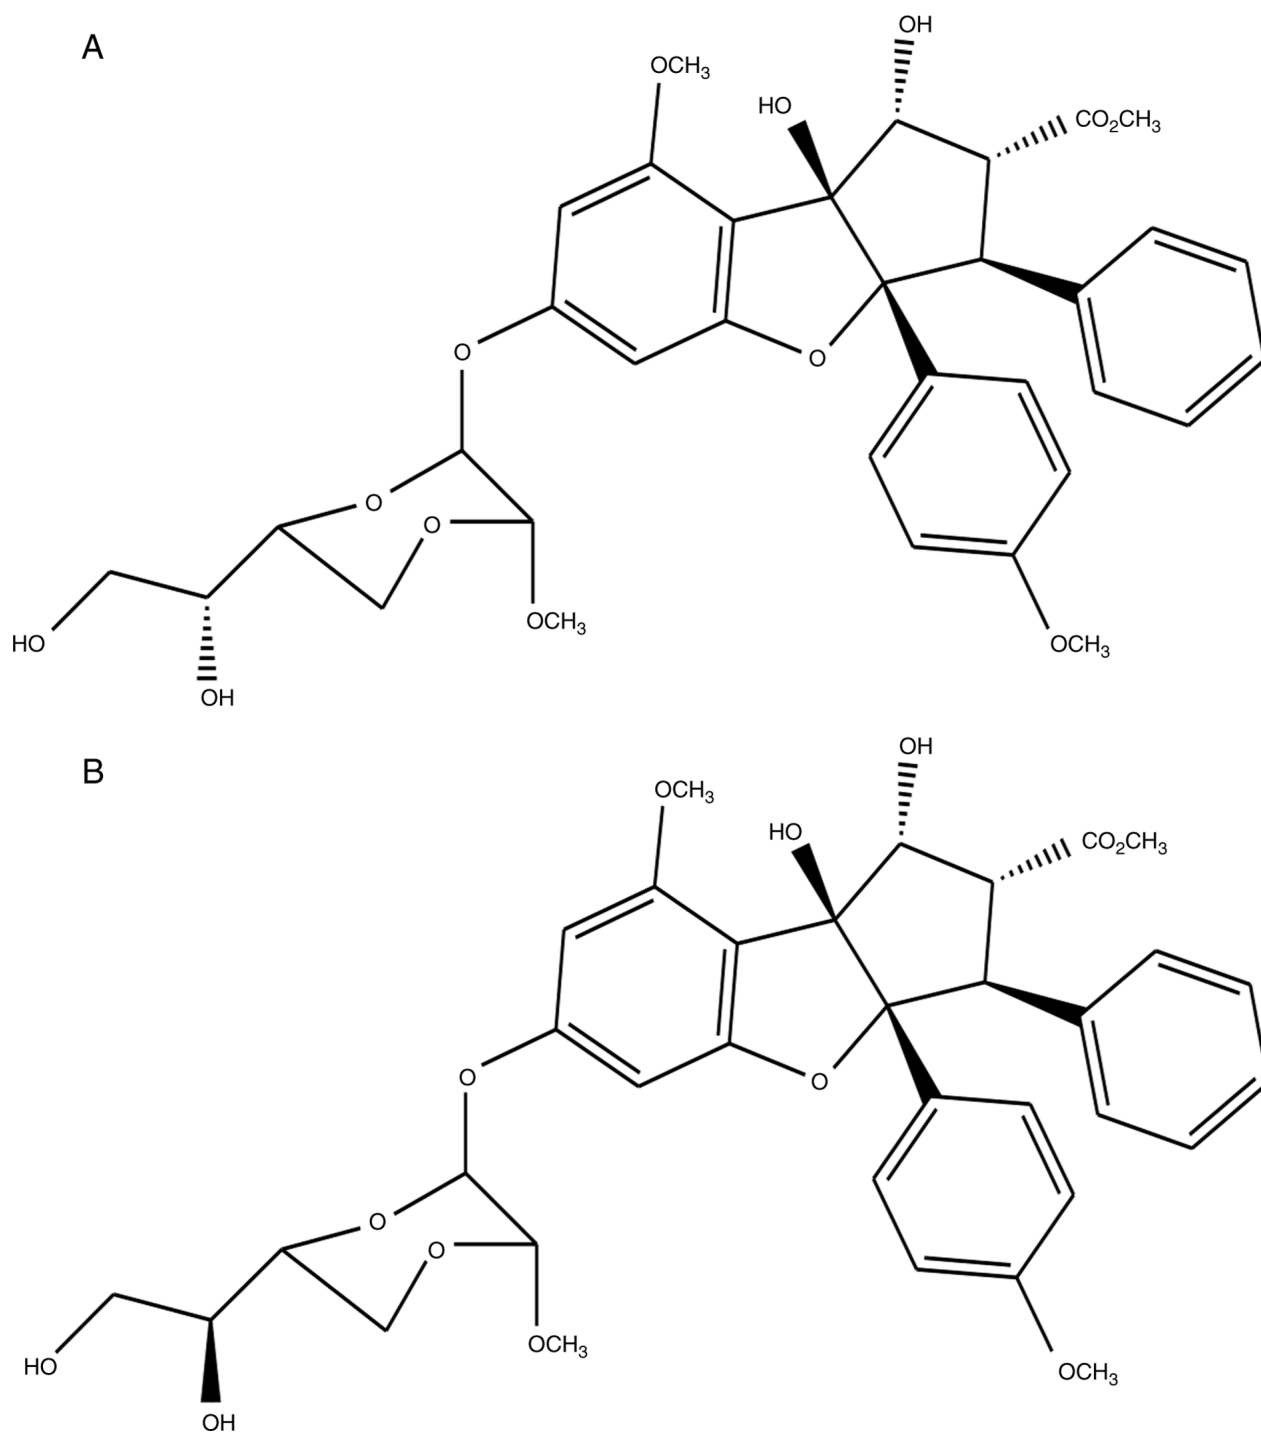

Figure S2. No difference in percentages sub-G<sub>1</sub> between untreated HK1 cells and HK1 cells in vehicle controls. DMSO, dimethyl sulfoxide; NaH<sub>2</sub>PO<sub>4</sub>, sodium dihydrogen phosphate.

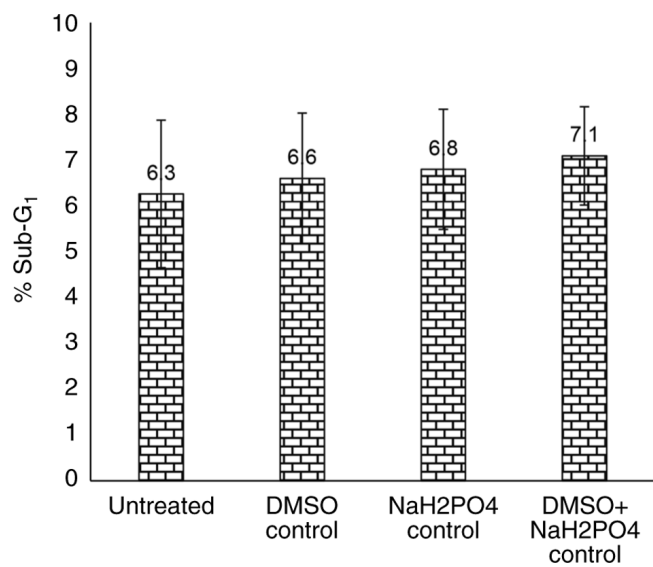

Figure S3. No difference in cell cycle progression between untreated HK1 cells compared with HK1 cells in vehicle controls. DMSO, dimethyl sulfoxide; NaH<sub>2</sub>PO<sub>4</sub>, sodium dihydrogen phosphate.

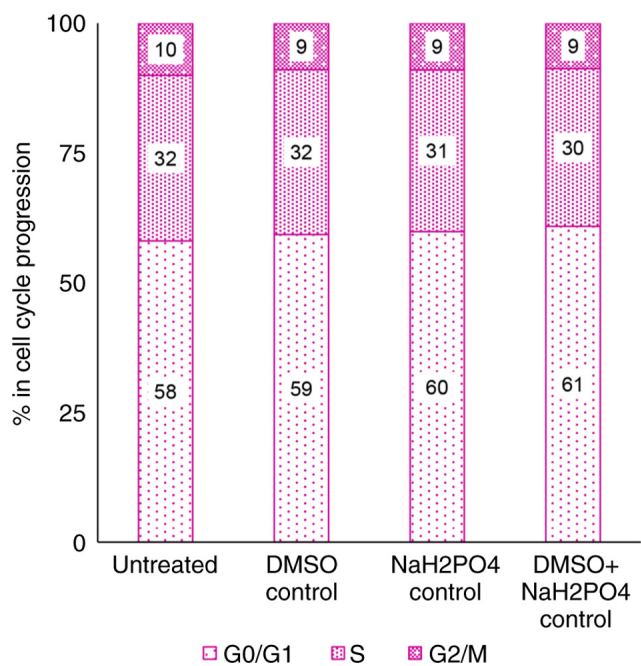

Figure S4. No difference in percentages of apoptosis between untreated HK1 cells and HK1 cells in vehicle controls. DMSO, dimethyl sulfoxide; NaH<sub>2</sub>PO<sub>4</sub>, sodium dihydrogen phosphate.

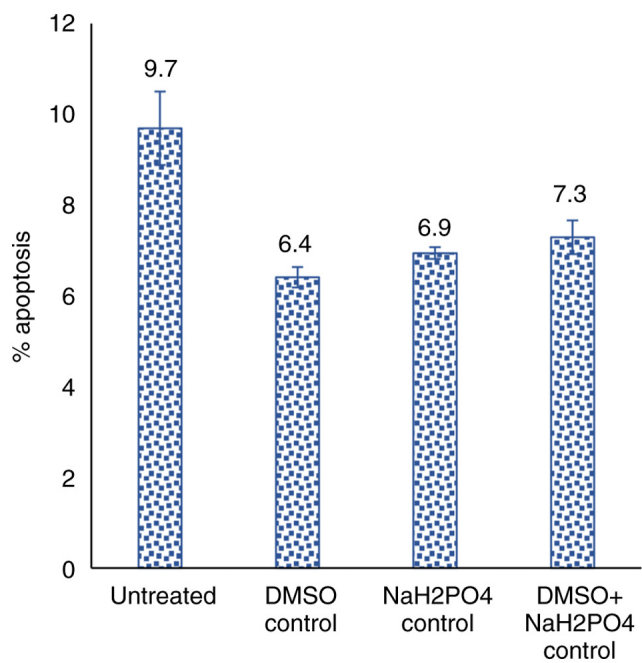

Supplement: Supplementary file 1 [file downloadSupplementary]
